# Supplementary material for: Maternal smoking during pregnancy and rapid weight gain from birth to early infancy
Source: PubMed Central journal article supplement — J Epidemiol. 2016 Dec 3;27(3):112–6. doi: 10.1016/j.je.2016.10.005 (PMC5363783; doi:10.1016/j.je.2016.10.005), 2016-12-03
Supplement: mmc1.pdf [file mmc1.pdf]

**eTable 1.** Risk ratios of rapid weight gain at early infancy by maternal smoking during pregnancy, limited to the subjects who had received check-ups at 4 month age

|                              | n / N (%)           | Crude<br>Risk ratio<br>(95% CI) | Multivariable<br>Risk ratio <sup>a</sup><br>(95% CI) | Further adjusted by                              |                                                      |                                                  |
|------------------------------|---------------------|---------------------------------|------------------------------------------------------|--------------------------------------------------|------------------------------------------------------|--------------------------------------------------|
|                              |                     |                                 |                                                      | Feeding<br>birth<br>infancy checkups<br>(95% CI) | between<br>and early<br>during pregnancy<br>(95% CI) | Maternal weight gain<br>Birth weight<br>(95% CI) |
| Non-smoker                   | 911/4,963<br>(18.4) | ref                             | ref                                                  | ref                                              | ref                                                  | ref                                              |
| Ex-smoker                    | 193/861<br>(22.4)   | 1.22 (1.06-1.40)                | 1.18 (1.02-1.37)                                     | 1.18 (1.01-1.37)                                 | 1.19 (1.03-1.38)                                     | 1.17 (1.01-1.35)                                 |
| Current-smoker               |                     |                                 |                                                      |                                                  |                                                      |                                                  |
| 1-5<br>cigarettes/day        | 41/183<br>(22.4)    | 1.22 (0.92-1.61)                | 1.28 (0.96-1.70)                                     | 1.27 (0.96-1.69)                                 | 1.28 (0.96-1.70)                                     | 1.19 (0.90-1.56)                                 |
| 6-10<br>cigarettes/day       | 28/114<br>(24.6)    | 1.33 (0.96-1.86)                | 1.38 (0.99-1.93)                                     | 1.39 (0.99-1.93)                                 | 1.40 (1.00-1.94)                                     | 1.28 (0.91-1.77)                                 |
| ≥11<br>cigarettes/day        | 10/29<br>(34.5)     | 1.89 (1.13-3.11)                | 1.98 (1.19-3.31)                                     | 1.97 (1.17-3.29)                                 | 2.01 (1.21-3.36)                                     | 1.77 (1.11-2.84)                                 |
| RR for one category increase |                     | 1.14 (1.07-1.23)                | 1.14 (1.06-1.23)                                     | 1.15 (1.07-1.24)                                 | 1.15 (1.07-1.23)                                     | 1.12 (1.04-1.20)                                 |

CI, confidence interval; RR, risk ratio.

<sup>a</sup> Adjusted for infant' sex, birth order, maternal age, paternal smoking during pregnancy, gestational age, and pre-pregnant body mass index
